# Supplementary material for: Metallophore Activity toward the Rare Earth Elements by Bacteria Isolated from Acid Mine Drainage Due to Coal Mining
Source: MDPI journal article supplement (doi:10.3390/microorganisms11112672), 2023-10-31
Supplement: s1 [file s1]

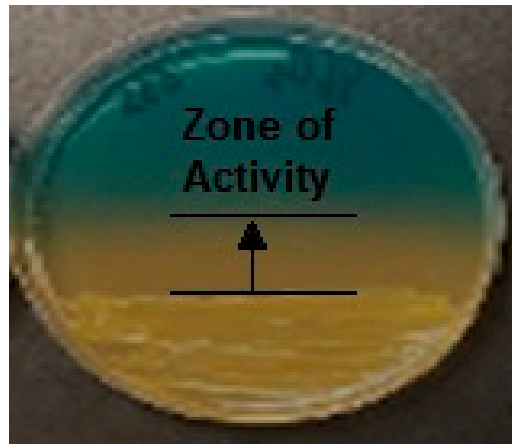

**Figure S1.** Measurement of the Zone of Activity for metallophores taken from the edge of growth to the edge of color change due to metallophore activity.

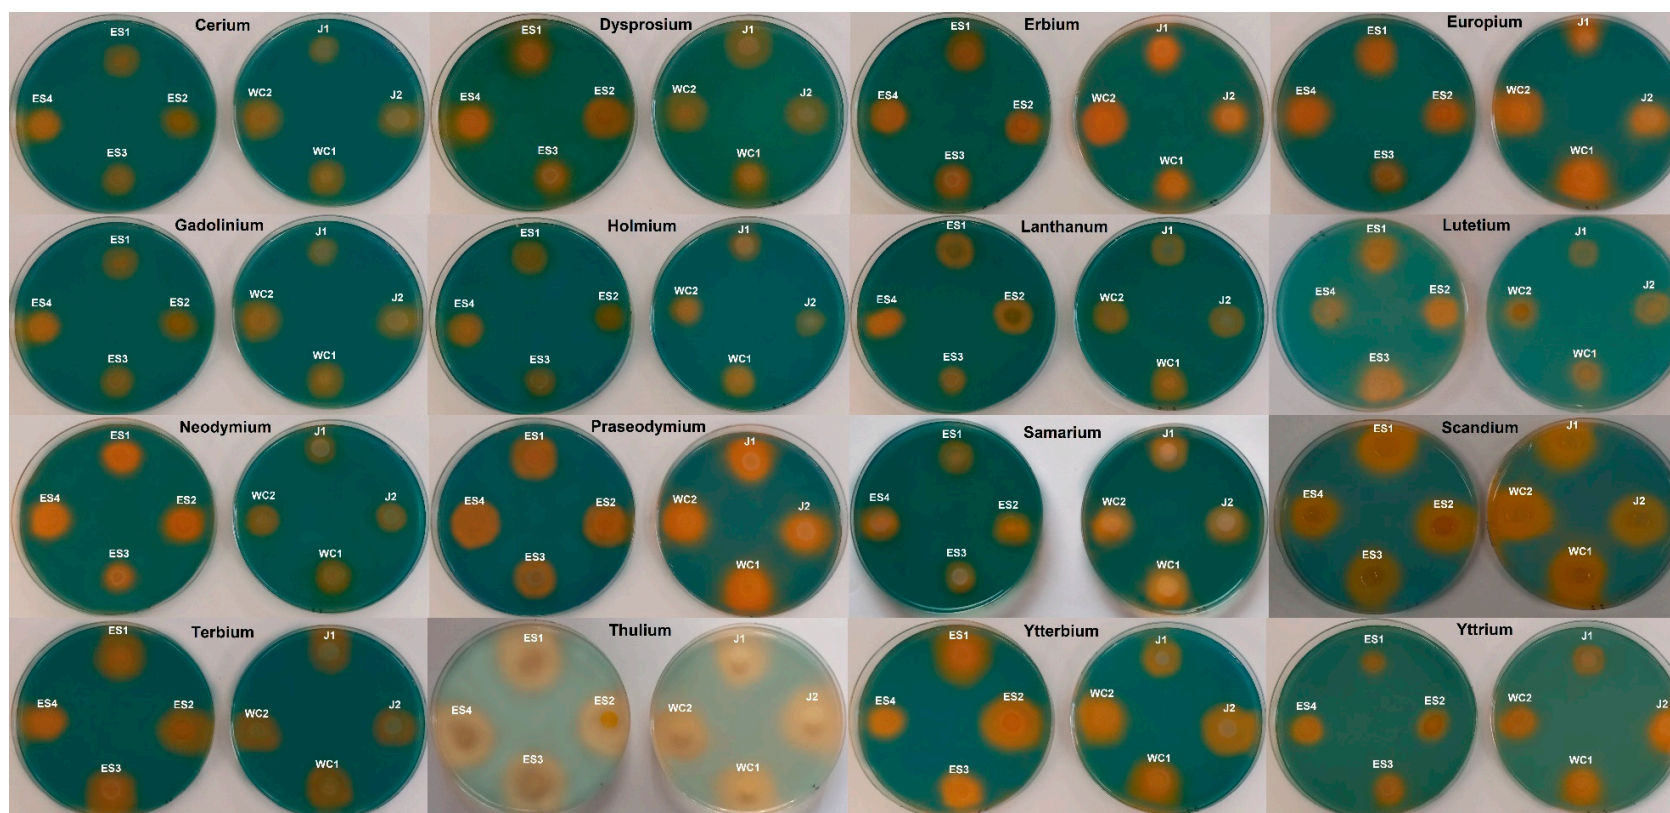

**Figure S2.** Range of metallophore activity against the rare earth elements for each bacterial isolate. Activity is seen based on the media changing from bluish to yellow/orange around growth due to metallophore activity.

**Table S1.** GenBank accession number for the 16S rRNA gene sequences of the 8 isolates used in this study.

| <b>Strain</b> | <b>Accession Number</b> |
|---------------|-------------------------|
| ES1           | OR496588                |
| ES2           | OR496587                |
| ES3           | OR520911                |
| ES4           | OR496592                |
| J1            | OR496585                |
| J2            | OR496589                |
| WC1           | OR496400                |
| WC2           | OR496583                |

Table S2. Zone of Activity of metallophores for each isolate and average Zone of Activity for each REE in mm.

| Element | ES1        | ES2        | ES3        | ES4        | J1         | J2         | WC1        | WC2        | Average    |
|---------|------------|------------|------------|------------|------------|------------|------------|------------|------------|
| Ce      | 14.33±0.58 | 13.67±1.15 | 6.67±1.15  | 6.33±0.58  | 9.67±1.15  | 13.33±1.15 | 13.33±0.58 | 10.67±0.58 | 11.00±3.20 |
| Dy      | 4.33±0.58  | 9.33±1.53  | 2.67±0.58  | 5.00±0.00  | 9.33±0.58  | 8.00±0.00  | 5.67±1.15  | 5.67±0.58  | 6.25±2.42  |
| Er      | 13.33±0.58 | 16.33±1.15 | 12.00±1.00 | 15.67±1.15 | 10.67±0.58 | 12.67±0.58 | 10.00±0.00 | 17.67±1.15 | 13.54±2.76 |
| Eu      | 22.00±1.00 | 23.67±1.15 | 9.33±0.58  | 18.67±1.15 | 14.33±1.53 | 15.33±0.58 | 18.33±0.58 | 19.67±1.15 | 17.67±4.57 |
| Gd      | 9.67±1.53  | 3.33±0.58  | 2.33±0.58  | 2.33±0.58  | 5.00±1.00  | 6.33±0.58  | 6.33±0.58  | 7.33±0.58  | 5.33±2.59  |
| Ho      | 15.33±0.58 | 6.00±1.00  | 8.33±0.58  | 9.00±0.00  | 8.67±0.58  | 8.67±0.58  | 13.33±0.58 | 5.33±0.58  | 9.33±3.40  |
| La      | 9.33±0.58  | 8.33±0.58  | 3.00±0.00  | 4.33±0.58  | 7.33±0.58  | 7.33±0.58  | 8.33±0.58  | 9.33±0.58  | 7.17±2.32  |
| Lu      | 10.67±0.58 | 14.33±0.58 | 7.00±1.00  | 8.67±0.58  | 9.00±0.00  | 10.33±0.58 | 9.67±0.58  | 8.33±0.58  | 9.75±2.19  |
| Nd      | 8.33±0.58  | 8.00±1.00  | 2.00±1.00  | 7.00±0.00  | 3.00±0.00  | 8.67±0.58  | 4.33±0.58  | 10.67±0.58 | 6.50±3.05  |
| Pr      | 27.00±2.00 | 31.00±2.00 | 26.00±1.00 | 22.33±0.58 | 23.67±1.15 | 25.67±1.15 | 26.67±1.15 | 19.67±0.58 | 25.25±3.40 |
| Sc      | 20.67±1.53 | 21.33±1.53 | 18.67±0.58 | 14.67±0.58 | 31.67±1.15 | 25.33±0.58 | 20.33±0.58 | 18.33±0.58 | 21.38±5.14 |
| Sm      | 8.67±0.58  | 10.67±0.58 | 9.00±1.00  | 8.00±0.00  | 11.67±0.58 | 13.33±0.58 | 8.67±0.58  | 7.67±0.58  | 9.71±1.99  |
| Tb      | 19.00±1.00 | 20.00±1.73 | 12.00±1.00 | 10.33±0.58 | 9.67±0.58  | 11.67±0.58 | 15.33±0.58 | 12.67±0.58 | 13.83±3.89 |
| Tm      | 17.33±1.15 | 20.67±1.15 | 12.00±0.00 | 10.67±0.58 | 20.67±1.15 | 16.67±0.58 | 20.33±0.58 | 13.67±1.15 | 16.50±4.01 |
| Yb      | 16.67±0.58 | 19.33±0.58 | 7.67±0.58  | 4.67±0.58  | 9.33±0.58  | 20.67±1.15 | 8.33±0.58  | 9.33±0.58  | 12.00±5.99 |
| Y       | 4.00±1.00  | 6.00±0.00  | 4.67±0.58  | 1.00±0.00  | 6.33±0.58  | 5.67±0.58  | 7.33±0.58  | 2.33±0.58  | 4.67±2.14  |
| Average | 13.79±6.47 | 14.50±7.70 | 8.96±6.37  | 9.29±5.93  | 11.88±7.46 | 13.10±6.28 | 12.27±6.37 | 11.15±5.36 |            |
